# Supplementary material for: Influence of different microstructures of cobalt on the catalytic activity for amination of ethylene glycol: comparison of HCP cobalt and FCC cobalt
Source: Royal Society of Chemistry journal article supplement (doi:10.1039/d2cy00156j), 2022-01-01
Supplement: d2cy00156j1.pdf [file d2cy00156j1.pdf]

## Supplementary Material

# **Influence of Different Microstructures of Cobalt on the Catalytic Activity for Amination of Ethylene Glycol: Comparison of HCP Cobalt and FCC Cobalt**

Zhiyong Xie, Hualiang An\*, Xinqiang Zhao\*, Yanji Wang

*Hebei Provincial Key Laboratory of Green Chemical Technology and High Efficient Energy Saving,  
Tianjin Key Laboratory of Chemical Process Safety, School of Chemical Engineering and  
Technology, Hebei University of Technology, Tianjin, 300130, China*

\*Corresponding author: Xinqiang Zhao and Hualiang An

Postal address:

School of Chemical Engineering and Technology, Hebei University of Technology, No. 8  
Guangrong Road, Hongqiao District, Tianjin, 300130, China

E-mail address: [zhaoxq@hebut.edu.cn](mailto:zhaoxq@hebut.edu.cn), [anhl@hebut.edu.cn](mailto:anhl@hebut.edu.cn)

1. Table S1. Catalytic performance of Co and Ni for amination of EG.
2. Table S2. Characterization of fcc-Co and hcp-Co catalyst.
3. Table S3. The selectivity of products for catalytic amination of EG.
4. Table S4. Entropic contribution of EG dehydrogenation process.
5. Table S5. Effect of initial hydrogen pressure on the amination of ethylene glycol.
6. Table S6. Effect of reaction time on EG amination at different temperature.
7. Fig.S1. XRD patterns of fcc-Co and used fcc-Co catalysts.

8. Fig.S2. Images of transition states.

9. Fig.S3. Comparison of two cyclization pathways to piperazine.

10. Fig.S4. TEM images of hcp-Co (100-300nm) catalysts (co-precipitation method).

11. Fig.S5. XRD patterns of hcp-Co (100-300nm) catalysts (co-precipitation method).

Table S1 Catalytic performance of Co and Ni for amination of EG

| Catalyst            | Temp<br>(°C) | $X_{EG}$<br>(%) | Yield (Selectivity) (%) |            |           |             |
|---------------------|--------------|-----------------|-------------------------|------------|-----------|-------------|
|                     |              |                 | MEA                     | EDA        | PIP       | MEA+EDA     |
| hcp-Co (50-100 nm)  | 185          | 24.8            | 7.7 (31.1)              | 2.5 (10.1) | 1.0 (3.9) | 10.2 (41.2) |
| hcp-Co (100-300 nm) | 185          | 25.2            | 8.2 (32.5)              | 2.5 (9.7)  | 1.0 (4.0) | 10.7 (42.2) |
| fcc-Ni (100-200 nm) | 185          | 13.7            | 1.8 (13.0)              | 0.1 (0.5)  | 0.2 (1.6) | 1.9 (13.5)  |

Hcp-Co (50-100 nm): this work. Metal fcc-Ni and hcp-Co catalysts (100-300 nm) were prepared by co-precipitation method <sup>1</sup>.

Reaction conditions: Initial hydrogen pressure =3 MPa, t=12 h,  $m_{(EG)}$ =1.12 g,  $m_{(NH_3)}$ =10 g, a weight percentage of catalyst=10%.

X: conversion; EG: ethylene glycol; MEA: monoethanolamine; EDA: ethylenediamine; PIP: piperazine;

Table S2 Characterization of fcc-Co and hcp-Co catalyst.

| Catalyst | H <sub>2</sub><br>adsorbed<br>( $\mu\text{mol g}^{-1}$ ) | Co Dispersion<br>(%) | BET surface area<br>( $\text{m}^2 \text{g}^{-1}$ ) | $D^{[a]}$<br>( $\mu\text{mol g}^{-1}$ ) |
|----------|----------------------------------------------------------|----------------------|----------------------------------------------------|-----------------------------------------|
| fcc-Co   | 85.6                                                     | 0.34                 | 4.56                                               | 57.1                                    |
| hcp-Co   | 84.3                                                     | 0.33                 | 4.09                                               | 56.2                                    |

[a]  $D$  represents the concentration of surface active sites derived from H<sub>2</sub> and O<sub>2</sub> titration.

Table S3 The selectivity of products for catalytic amination of EG.

| Catalyst | Temp<br>(°C) | $X_{EG}$<br>(%) | Selectivity (%) |      |      |     |     |      |       |                                  |
|----------|--------------|-----------------|-----------------|------|------|-----|-----|------|-------|----------------------------------|
|          |              |                 | MEA             | EDA  | PIP  | AEP | HEP | DETA | HEEDA | Other<br>degradation<br>products |
| fcc-Co   | 175          | 24.8            | 33.5            | 14.0 | 6.7  | 1.7 | 1.6 | 0.6  | 2.7   | 39.2                             |
|          | 185          | 33.9            | 28.2            | 15.3 | 13.2 | 1.4 | 1.4 | 2.3  | 1.6   | 36.6                             |
|          | 195          | 35.4            | 24.5            | 14.5 | 16.2 | 1.3 | 1.2 | 1.6  | 1.6   | 39.1                             |
| hcp-Co   | 175          | 10.6            | 33.7            | 0.4  | 1.5  | 4.5 | 6.0 | 1.9  | 6.0   | 46.0                             |
|          | 185          | 24.8            | 31.1            | 10.1 | 3.9  | 1.7 | 2.6 | 0.8  | 3.2   | 46.6                             |
|          | 195          | 35.0            | 26.6            | 9.0  | 9.9  | 1.7 | 2.0 | 0.9  | 1.4   | 48.5                             |

X: conversion; EG: ethylene glycol; MEA: monoethanolamine; EDA: ethylenediamine; PIP: piperazine; AEP: aminoethylpiperazine; HEP: hydroxyethylpiperazine; DETA: diethylenetriamine; HEEDA: hydroxyethylethylenediamine; Other degradation products: carbon monoxide, methanol, methylamine, methane, formaldehyde.

Table S4 Entropic contribution of EG dehydrogenation process (T=458 K).

| Intermediate or<br>transition state  | TS (eV)  |           |            |            |
|--------------------------------------|----------|-----------|------------|------------|
|                                      | Co (111) | Co (0001) | Co (10-10) | Co (10-11) |
| OHCH <sub>2</sub> CH <sub>2</sub> OH | 0.24378  | 0.24771   | 0.17619    | 0.14631    |
| TS1                                  | 0.19826  | 0.30146   | 0.20310    | 0.21594    |
| OHCH <sub>2</sub> CH <sub>2</sub> O  | 0.20837  | 0.21173   | 0.25479    | 0.20344    |
| TS3                                  | 0.43394  | 0.44093   | 0.30483    | 0.20911    |
| OHCH <sub>2</sub> CHO                | 0.10520  | 0.10690   | 0.12330    | 0.13516    |

Table S5 Effect of initial hydrogen pressure on the amination of ethylene glycol.

| Entry | Catalyst | Initial<br>hydrogen<br>pressure<br>/MPa | $X_{EG}$<br>(%) | Yield (Selectivity) (%) |            |           |             |
|-------|----------|-----------------------------------------|-----------------|-------------------------|------------|-----------|-------------|
|       |          |                                         |                 | MEA                     | EDA        | PIP       | MEA+EDA     |
| 1     | hcp-Co   | 1                                       | 18.8            | 6.3 (33.4)              | 2.3 (12.2) | 0.8 (4.2) | 8.6 (45.6)  |
| 2     | hcp-Co   | 2                                       | 22.7            | 7.3 (31.9)              | 2.5 (11.0) | 0.8 (3.6) | 9.8 (42.9)  |
| 3     | hcp-Co   | 3                                       | 25.2            | 8.2 (32.5)              | 2.5 (9.7)  | 1.0 (4.0) | 10.7 (42.2) |
| 4     | hcp-Co   | 4                                       | 24.9            | 8.1 (32.6)              | 2.3 (9.5)  | 0.9 (3.7) | 10.4 (42.1) |

Reaction conditions: T=185 °C, t=12 h,  $m_{(EG)}$ =1.12 g,  $m_{(NH_3)}$ =10 g,  $m_{(H_2O)}$ =6 g, a weight percentage of catalyst=10%.

X: conversion; EG: ethylene glycol; MEA: monoethanolamine; EDA: ethylenediamine; PIP: piperazine;

Table S6 Effect of reaction time on EG amination at different temperature.

| Catalyst | Temp<br>(°C) | Time<br>(h) | X <sub>EG</sub><br>(%) | Yield (Selectivity) (%) |            |            |             |
|----------|--------------|-------------|------------------------|-------------------------|------------|------------|-------------|
|          |              |             |                        | MEA                     | EDA        | PIP        | MEA+EDA     |
| fcc-Co   | 175          | 4           | 9.7                    | 4.1 (41.8)              | 0.1 (0.5)  | 0.3 (2.7)  | 4.2 (42.3)  |
|          | 175          | 8           | 18.6                   | 8.7 (46.8)              | 2.3 (12.1) | 2.3 (12.2) | 11.0 (58.9) |
|          | 175          | 12          | 24.8                   | 8.3 (33.5)              | 3.5 (14.0) | 1.7 (6.7)  | 11.8 (47.5) |
|          | 185          | 4           | 13.2                   | 7.8 (58.9)              | 0.7 (5.3)  | 0.7 (5.1)  | 8.5 (64.2)  |
|          | 185          | 8           | 25.6                   | 10.1 (39.3)             | 3.1 (11.9) | 1.3 (5.0)  | 13.2 (51.2) |
|          | 185          | 12          | 33.9                   | 9.6 (28.2)              | 5.2 (15.3) | 4.5 (13.2) | 14.8 (43.5) |
|          | 195          | 4           | 27.1                   | 7.2 (26.6)              | 2.9 (10.5) | 2.7 (10.0) | 10.1 (37.1) |
|          | 195          | 8           | 29.7                   | 10.1 (34.0)             | 3.3 (11.0) | 3.2 (10.8) | 13.4 (45.0) |
|          | 195          | 12          | 35.4                   | 8.7 (24.5)              | 5.1 (14.5) | 5.7 (16.2) | 13.8 (39.0) |
| hcp-Co   | 175          | 4           | 6.6                    | 2.7 (40.3)              | 0.1 (0.6)  | 0.2 (2.9)  | 2.8 (40.9)  |
|          | 175          | 8           | 9.3                    | 3.4 (36.4)              | 0.1 (0.5)  | 0.1 (1.4)  | 3.5 (36.9)  |
|          | 175          | 12          | 10.6                   | 3.6 (33.7)              | <0.1(0.4)  | 0.2 (1.5)  | 3.6 (34.1)  |
|          | 185          | 4           | 7.5                    | 3.3 (44.1)              | 0.1 (1.1)  | 1.5 (19.9) | 3.4 (45.2)  |
|          | 185          | 8           | 17.8                   | 8.2 (46.0)              | 1.2 (6.8)  | 1.1 (6.4)  | 9.4 (52.8)  |
|          | 185          | 12          | 24.8                   | 7.7 (31.1)              | 2.5 (10.1) | 1.0 (3.9)  | 10.2 (41.2) |
|          | 195          | 4           | 18.7                   | 5.8 (30.7)              | 0.7 (3.8)  | 0.5 (2.8)  | 6.5 (34.5)  |
|          | 195          | 8           | 26.6                   | 8.3 (31.0)              | 2.2 (8.1)  | 1.1 (4.2)  | 10.5 (39.1) |
|          | 195          | 12          | 35.0                   | 9.3 (26.6)              | 3.2 (9.0)  | 3.5 (9.9)  | 12.5 (35.6) |

Reaction conditions: Initial hydrogen pressure=3 MPa,  $m_{(EG)}=1.12$  g,  $m_{(NH_3)}=10$  g,  $m_{(H_2O)}=6$  g, a weight percentage of catalyst=10%.

X: conversion; EG: ethylene glycol; MEA: monoethanolamine; EDA: ethylenediamine; PIP: piperazine.

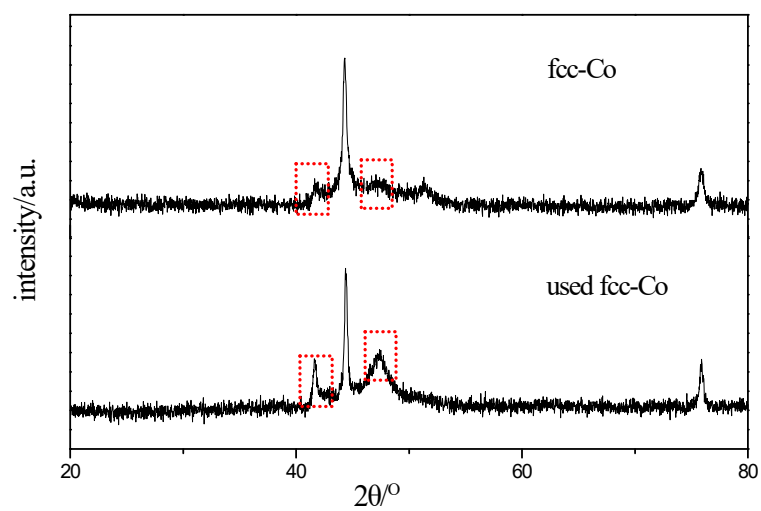

Fig.S1 XRD patterns of fcc-Co and used fcc-Co catalysts.

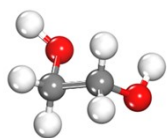

EG

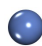

Co

Co(111)

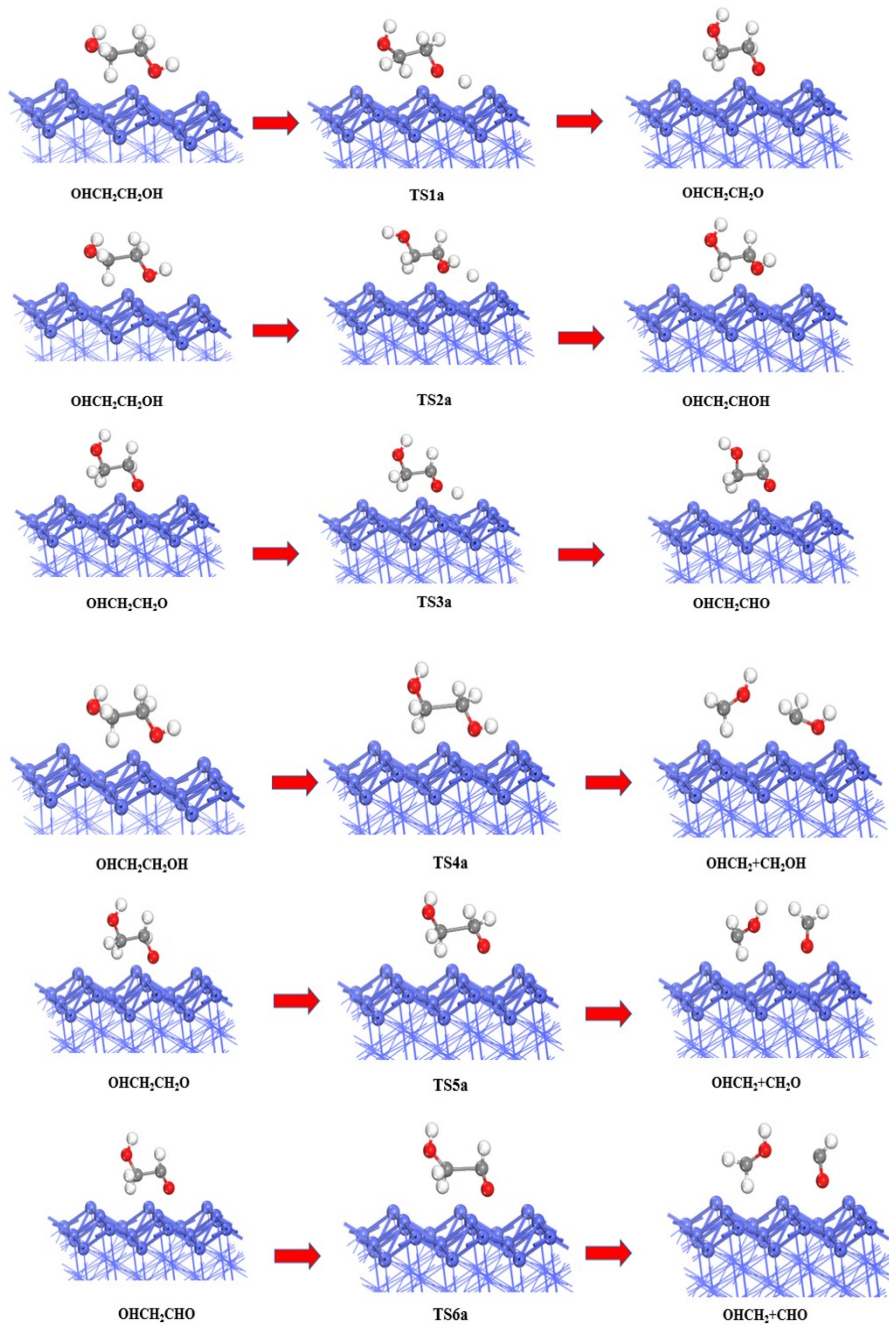

Co(10-11)

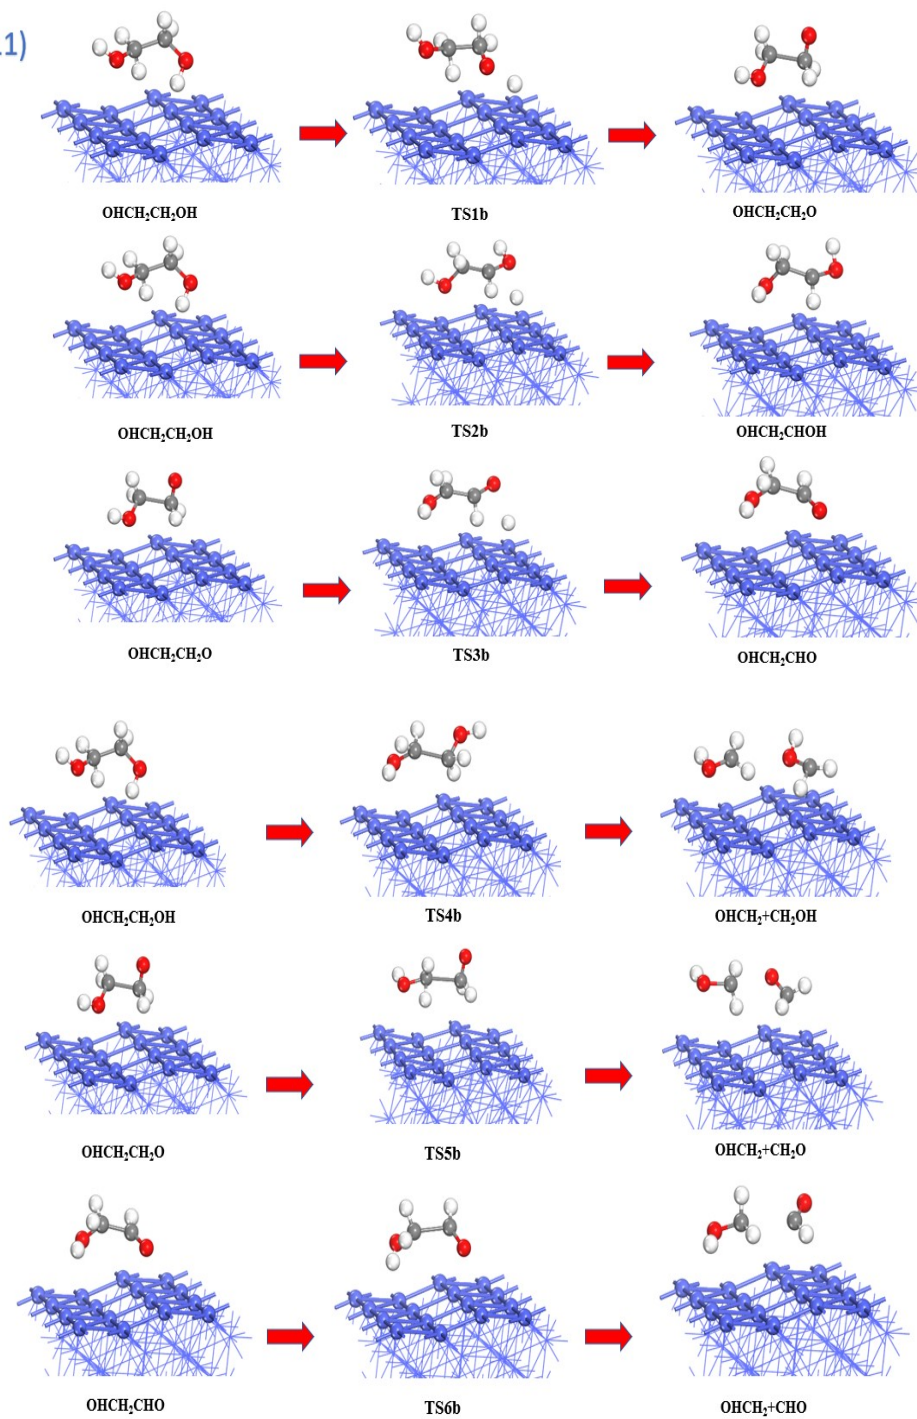



Co(10-10)

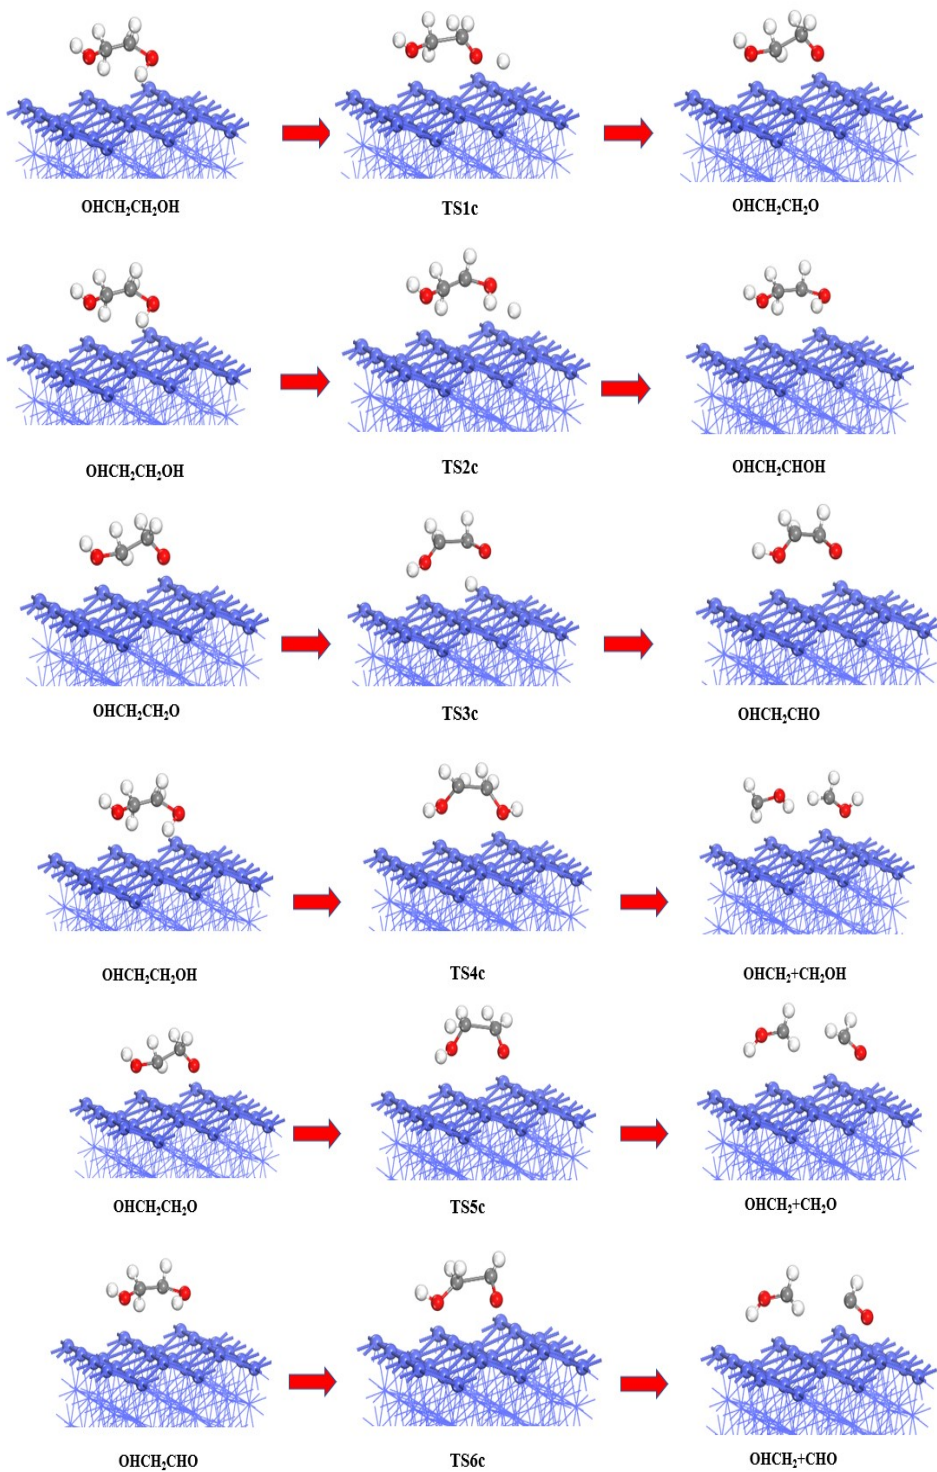

Co(0001)

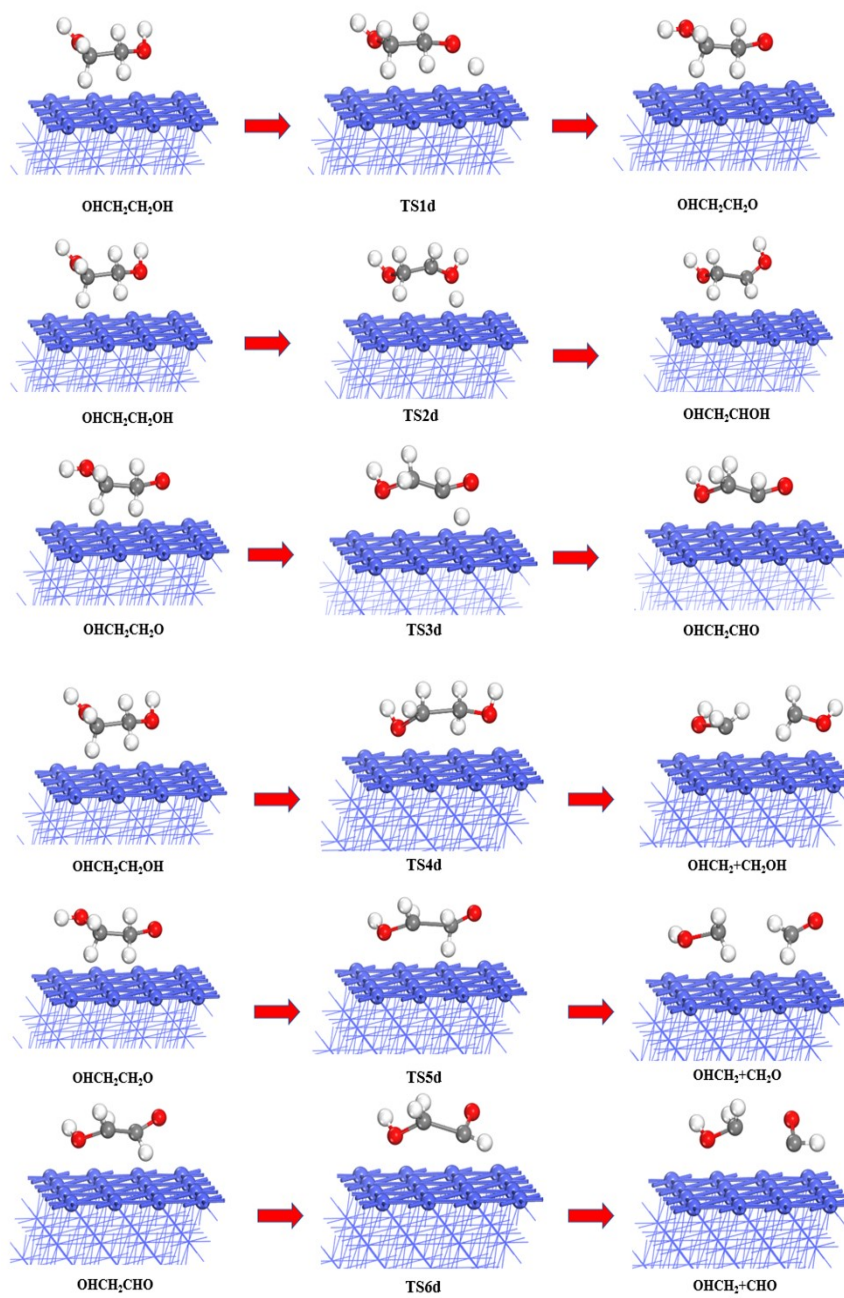

Fig.S2. Images of transition states

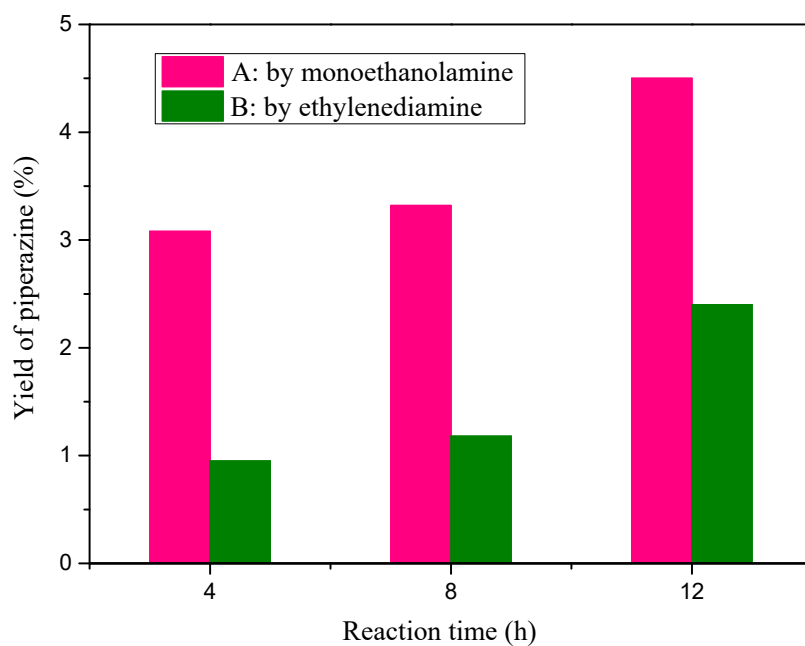

Fig.S3. Comparison of two cyclization pathways to piperazine.

A: Ethanolamine self-condensation reaction: initial hydrogen pressure=3 MPa,  $m_{(\text{MEA})}=10$  g,  $m_{(\text{H}_2\text{O})}=70$  g, a weight percentage of catalyst (hcp-Co) =10%.

B: Ethylenediamine and ethylene glycol reaction: initial hydrogen pressure=3 MPa,  $m_{(\text{EG})}=5.08$  g,  $m_{(\text{EDA})}=4.92$  g  $m_{(\text{H}_2\text{O})}=70$  g, a weight percentage of catalyst (hcp-Co) =10%.

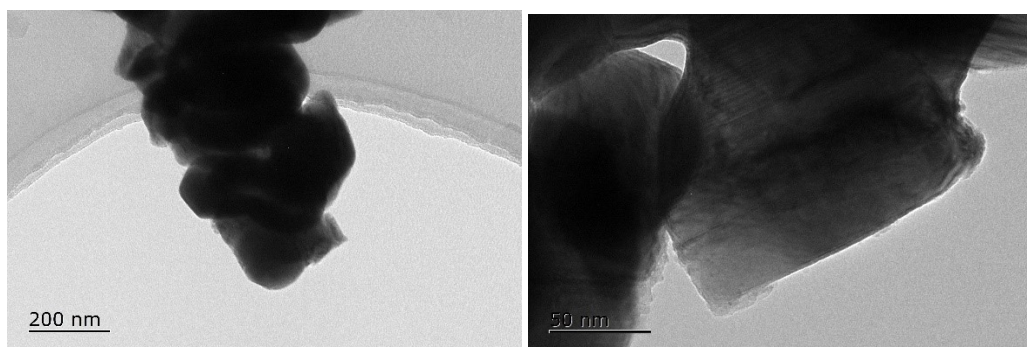

Fig.S4. TEM images of hcp-Co (100-300 nm) catalysts (co-precipitation method).

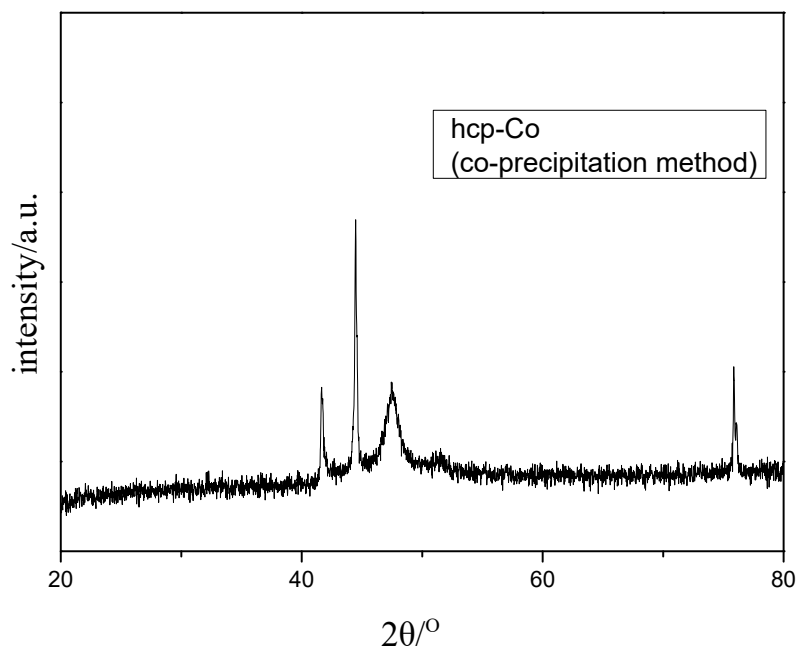

Fig.S5. XRD patterns of hcp-Co (100-300 nm) catalysts (co-precipitation method).

## References

- 1 A. Fischer, M. Maciejewski, T. Bürgi, T. Mallat and A. Baiker, *J. Catal.*, 1999, **183**, 373-383.
